# Supplementary material for: Connections between the human gut microbiome and gestational diabetes mellitus
Source: PubMed Central journal article supplement (PMC5597849; doi:10.1093/gigascience/gix058), 2017-07-31
Supplement: gix058_GIGA-D-16-00167_Revision-2.pdf [file gix058_GIGA-D-16-00167_Revision-2.pdf]

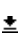

## Connections between human gut microbiome and gestational diabetes mellitus

Ya-Shu Kuang<sup>1,†</sup>, Jin-Hua Lu<sup>1,2,†</sup>, Sheng-Hui Li<sup>1,†</sup>, Jun-Hua Li<sup>3,4</sup>, Ming-Yang Yuan<sup>1,2</sup>, Jian-Rong He<sup>1,2</sup>, Nian-Nian Chen<sup>1,2</sup>, Wan-Qing Xiao<sup>1,2</sup>, Song-Ying Shen<sup>1,2</sup>, Lan Qiu<sup>1,2</sup>, Ying-Fang Wu<sup>1,2</sup>, Cui-Yue Hu<sup>1,2</sup>, Yan-Yan Wu<sup>1,2</sup>, Wei-Dong Li<sup>1,2</sup>, Qiao-Zhu Chen<sup>5</sup>, Hong-Wen Deng<sup>1,6</sup>, Christopher J Papanian<sup>7</sup>, Hui-Min Xia<sup>1,8\*</sup>, Xiu Qiu<sup>1,2\*</sup>

<sup>1</sup>Division of Birth Cohort Study, Guangzhou Women and Children's Medical Center, Guangzhou Medical University, Guangzhou 510623, China

<sup>2</sup>Department of Women and Children's Health Care, Guangzhou Women and Children's Medical Center, Guangzhou Medical University, Guangzhou 510623, China

<sup>3</sup>BGI-Shenzhen, China National GeneBank-Shenzhen, Shenzhen 518083, China

<sup>4</sup>Shenzhen Key Laboratory of Human commensal microorganisms and Health Research, BGI-Shenzhen, Shenzhen 518083, China

<sup>5</sup>Department of Obstetrics and Gynecology, Guangzhou Women and Children's Medical Center, Guangzhou Medical University, Guangzhou 510623, China

<sup>6</sup>Center of Bioinformatics and Genomics, Department of Biostatistics and Bioinformatics, Tulane School of Public Health and Tropic Medicine, USA

<sup>7</sup>Department of Basic Medical Science, School of Medicine, University of Missouri – Kansas City, 2411 Holmes St., Kansas City, MO 64108

<sup>8</sup>Department of Neonatal Surgery, Guangzhou Women and Children's Medical Center, Guangzhou Medical University, Guangzhou 510623, China

### E-Mails:

kuangyashu@126.com (YSK); lujinhua10@gmail.com (JHL\*); lishenghui1005@gmail.com (SHL); lijinhua@genomics.cn (JHL); ymyeasy@126.com (MYY); hjr0703@163.com (JRH); cnnfezx@163.com (NNC); 15915711316@163.com (WQX); shsy\_22@163.com (SYS); 38904442@qq.com (LQ); mywachy@163.com (YFW); bighcy@163.com (CYH); 153050569@qq.com (YYW); liweidong30303@163.com (WDL); bigcqz@163.com (QZC); hdeng2@tulane.edu (HWD); PapanianC@umkc.edu (CJP); huimin.xia876001@gmail.com (HMX); qxiu0161@163.com (XQ)

† The authors contributed equally to this work.

### \* Correspondence to:

Xiu Qiu, Division of Birth Cohort Study, Guangzhou Women and Children's Medical Center, Guangzhou Medical University, 9 Jinsui Road, Guangzhou 510623, China; Phone: 86 2038367162; Fax: 86 2038367162; E-mail: [qxiu0161@163.com](mailto:qxiu0161@163.com); [xiu.qiu@bigcs.org](mailto:xiu.qiu@bigcs.org).

Hui-Min Xia, Division of Birth Cohort Study, Guangzhou Women and Children's Medical Center, Guangzhou Medical University, 9 Jinsui Road, Guangzhou 510623, China; Phone: 86 2038076019; Fax: 86 2038076020; E-mail: [huimin.xia876001@gmail.com](mailto:huimin.xia876001@gmail.com); [huimin.xia@bigcs.org](mailto:huimin.xia@bigcs.org).

1  
2  
3  
4  
5  
6  
7  
8  
9  
10  
11  
12  
13  
14  
15  
16  
17  
18  
19  
20  
21  
22  
23  
24  
25  
26  
27  
28  
29  
30  
31  
32  
33  
34  
35  
36  
37  
38  
39  
40  
41  
42  
43  
44  
45  
46  
47  
48  
49  
50  
51  
52  
53  
54  
55  
56  
57  
58  
59  
60  
61  
62  
63  
64  
65

1  
2  
3  
4  
5  
6  
7  
8  
9  
10  
11  
12  
13  
14  
15  
16  
17  
18  
19  
20  
21  
22  
23  
24  
25  
26  
27  
28  
29  
30  
31  
32  
33  
34  
35  
36  
37  
38  
39  
40  
41  
42  
43  
44  
45  
46  
47  
48  
49  
50  
51  
52  
53  
54  
55  
56  
57  
58  
59  
60  
61  
62  
63  
64  
65

**Abstract**

**Background**

The human gut microbiome can modulate metabolic health and affect insulin resistance, and may play an important role in the etiology of gestational diabetes mellitus (GDM). Here, we compared the gut microbial composition of 43 GDM patients and 81 healthy pregnant women via whole-metagenome shotgun sequencing of their fecal samples collected at 21-29 weeks, to explore associations between GDM and the composition of microbial taxonomic units and functional genes.

**Results**

Metagenome-wide association study (MGWAS) identified 154,837 genes, which clustered into 129 metagenome linkage groups (MLGs) for species description, with significant relative abundance differences between the two cohorts. *Parabacteroides distasonis*, *Klebsiella variicola*, etc., were enriched in GDM patients, whereas *Methanobrevibacter smithii*, *Alistipes* spp., *Bifidobacterium* spp. and *Eubacterium* spp. were enriched in controls. The ratios of the gross abundances of GDM-enriched MLGs to control-enriched MLGs were positively correlated with blood glucose levels. Random Forest model shows fecal MLGs have excellent discriminatory power to predict GDM status.

**Conclusions**

Our study discovered novel relationships between gut microbiome and GDM status, and suggested that changes in microbial composition may potentially be used to identify individuals at risk for GDM.

1  
2  
3  
4  
5  
6  
7 1  
8 2 **Background**  
9

10 3 The increasing prevalence of gestational diabetes mellitus (GDM), and its subsequent health  
11 4 outcomes, are a significant public health concern and a major challenge for obstetric practice [1].  
12 5 GDM represents a heterogeneous group of metabolic disorders [2] which affects 3-14% of  
13 6 pregnancies, and 20-50% of these affected women are expected to develop type 2 diabetes (T2D)  
14 7 within 5 years [3, 4]. Emerging evidence has revealed a link between the gut microbiome and  
15 8 human metabolic health including T2D [5, 6], leading us to hypothesize that the gut microbiome  
16 9 may impact gestational metabolism and development of GDM.

17 10 Microbial dysbiosis in the human gut may be an important environmental risk factor for  
18 11 abnormal host metabolism, as recently exemplified in studies of obesity and T2D (reviewed by  
19 12 Karlsson, et. al) [7]. A study using an experimental animal model revealed that reduced numbers  
20 13 of *Bifidobacteria* led to enhanced endogenous lipopolysaccharide production, endotoxemia, and  
21 14 associated obesity and insulin resistance [8]. In humans, excessive weight gain and obesity in  
22 15 pregnancy resulted in deteriorated glucose tolerance and increased risk of GDM [9, 10]. *Prevotella*  
23 16 *copri* and *Bacteroides vulgatus* have been identified as the main species driving the association  
24 17 between biosynthesis of branched-chain amino acids, insulin resistance, and glucose intolerance  
25 18 [11]. *Bacteroides* spp. and *Staphylococcus aureus* are significantly more abundant in overweight  
26 19 women than in normal-weight women [12].

27 20 While the majority of previous studies have focused on associations between intestinal  
28 21 microbiota and obese states or T2D [6, 13-15], some recent studies have sought to characterize  
29 22 microbiota changes during pregnancy, with the goal of providing novel insights into the  
30 23 relationship between microbiota changes during pregnancy and potential metabolic consequences  
31 24 [16]. Studies based on sequencing of 16S ribosomal RNA have revealed novel relationships  
32 25 between gut microbiome composition and the metabolic hormonal environment in overweight and  
33 26 obese pregnant women in early gestation [17]. Koren et al. found that maternal gut microbiota  
34 27 changed from first to third trimesters, with a decline in butyrate-producing bacteria and increased  
35 28 *Bifidobacteria*, *Proteobacteria*, and lactic-acid producing bacteria [16]. Further, transplants of  
36 29 fecal material obtained during different trimesters were sufficient to confer different phenotypes in  
37 30 mouse models, with third-trimester fecal transplants leading to increased adiposity and

1  
2  
3  
4  
5  
6  
7 1 inflammation [16]. These studies suggest that pregnancy is associated with major shifts in the gut  
8 2 microbiome which may play an important role in observed increases in gestational inflammation,  
9 3 thereby potentially contributing to development of GDM. However, studies focusing on changes  
10 4 in the gut microbiome during pregnancy and development of GDM have not been reported so far.

11 5 Metagenomic shotgun sequencing, in which the full complement of genes present in the  
12 6 microbiome are sequenced, can furnish information about the relative abundance of genes in  
13 7 functional pathways and at all taxonomical levels [18]. In this study, we used whole-metagenome  
14 8 shotgun sequencing analyses of the gut microbiome during pregnancy to explore associations  
15 9 between GDM and the composition and abundance of microbial taxonomic units and functional  
16 10 genes. The objective was to obtain a comprehensive understanding of the connections between gut  
17 11 microbiome and the development of GDM.  
18 12

### 13 **Data description**

14 14 Whole-metagenome shotgun sequencing was used to test gut microbial composition in fecal  
15 15 samples from 43 GDM patients and 81 healthy pregnant women based on the Illumina HiSeq2000  
16 16 platform in BGI-Shenzhen, China. We constructed a paired-end library with insert size of 350 base  
17 17 pairs (bp) for every sample, and sequenced with 100bp read length from each end. Sequencing  
18 18 reads for fecal samples were independently processed for quality control and host sequences  
19 19 removal based on an in-house pipeline (see Methods), and a total of 795 Gbp high quality  
20 20 metagenomic data (average per sample, 6.4 Gbp) were generated for further analysis. We  
21 21 performed *de novo* assembly and gene calling for data of each sample and constructed a  
22 22 non-redundant gene catalogue of all pregnant women fecal samples containing 4,344,984 genes.  
23 23 This gene catalogue provided a suitable reference for metagenomic gene quantification, microbial  
24 24 diversity analysis, and metagenome-wide association study for the pregnant women fecal samples.  
25 25

### 26 **Results**

#### 27 **Comparison of the gut microbiota between GDM patients and healthy pregnant women**

28 28 First, we explored potential differences in the gut microbiome between 43 GDM patients and 81  
29 29 healthy pregnant women. We obtained 795.3 Gb of high-quality data ( $6.4 \pm 1.3$  Gb per sample) via  
30 30 metagenomic shotgun sequencing of their fecal samples to perform this analysis. **When we**

1  
2  
3  
4  
5  
6  
7 1 quantified the microbial (alpha) diversity within each subject, the GDM patients showed  
8 2 significantly lower gene count and Shannon index compared with the healthy pregnant women ( $P$   
9 3  $<0.05$  for both indexes, Mann-Whitney U test). We then aligned the sequencing reads (43.8%)  
10 4 against available microbial genomes from the National Center for Biotechnology Information and  
11 5 generated taxonomic composition for all samples at the taxonomic levels of phylum, class, order,  
12 6 family, genus and species. Multivariate analysis based on Bray–Curtis distances between  
13 7 microbial genera revealed significant differences between GDM patients and healthy controls  
14 8 (Figure 1a). We then performed the Mann–Whitney U test to identify phylogenetic differences  
15 9 between GDM patients and healthy controls. Abundance at the phylum and class levels was  
16 10 similar between GDM patients and healthy controls; however, the order *Clostridiales* and the  
17 11 family *Coriobacteriaceae* were enriched in healthy controls. At the genus level, GDM patients had  
18 12 a significantly higher abundance of *Parabacteroides*, *Megamonas* and *Phascolarctobacterium*,  
19 13 while healthy controls were significantly enriched for *Ruminiclostridium*, *Roseburia*, *Eggerthella*,  
20 14 *Fusobacterium*, *Haemophilus*, *Mitsukella*, and *Aggregatibacter* (Figure 1b). We also found a  
21 15 number of bacterial species that differed significantly between GDM patients and healthy controls,  
22 16 consistent with the genus level observations (Table S2). These findings suggest dysbiosis of the  
23 17 gut microbiota among GDM patients.  
24 18

#### 19 **Identification of GDM-associated markers from gut microbiome**

20 To explore detailed signatures of the gut microbiome in GDM patients and healthy controls, we  
21 constructed a non-redundant gene catalogue consisting of 4.34 million genes, which allowed an  
22 average reads mapping rate of 79.5% for sequenced samples. We identified 154,837 genes that  
23 displayed significant abundance differences between the two groups (Mann-Whitney U test,  
24  $q < 0.05$ ) (Figure S1 shows the P-value distribution between GDM patients and healthy pregnant  
25 women for all genes tested). About 68% of these genes were clustered into 129 metagenomic  
26 linkage groups (MLGs) (Table S3), which allowed species level description for the microbiome  
27 differences. The 71 MLGs enriched in GDM patients included *Parabacteroides distasonis*,  
28 *Klebsiella variicola*, *Catenibacterium mitsuokai*, *Coprococcus comes* and *Citrobacter spp.*,  
29 whereas the 58 MLGs enriched in healthy pregnant women included *Methanobrevibacter smithii*,  
30 *Alistipes spp.* (*A. shahii*, *A. senegalensis*), *Bifidobacterium spp.* (*B. animalis*, *B.*

1  
2  
3  
4  
5  
6  
7 1 *pseudocatenulatum*) and *Eubacterium* spp. (*E. siraeum*, *E. eligens*). The GDM-enriched and  
8  
9 2 control enriched MLGs were highly positively interconnected within each group; however, only  
10  
11 3 few negative connections were found between the two groups (Figure 2). Notably, GDM-enriched  
12  
13 4 MLGs of *Enterobacteriaceae*, including *K. variicola*, *E. coli*, *Enterobacter cloacae* and  
14  
15 5 *Citrobacter* spp., were closely linked (correlation coefficients >0.40 between each other),  
16  
17 6 representing a cooperative promoting function of *Enterobacteriaceae* to GDM development. Of  
18  
19 7 particular interest, we also observed that the relative abundance of *Enterobacteriaceae* was  
20  
21 8 positively associated with pre-pregnancy body mass index (PBMI, Figure S2).

#### 22 10 **Correlations between maternal blood glucose levels and gut microbiota**

23 11 In order to explore the potential clinical paths by which changes in the microbiome might lead to  
24  
25 12 GDM, we investigated whether the MLGs can affect blood glucose tolerance. The ratios of the  
26  
27 13 gross abundances of GDM-enriched MLGs to those of control-enriched MLGs were obviously  
28  
29 14 positively correlated with blood glucose levels during the second trimester of pregnancy (Figure  
30  
31 15 3), indicating that dysbiosis of the microbiome has a significant relationship with GDM status.  
32  
33 16 Several GDM-enriched MLGs [e.g. GDM67, GDM64, *P. distasonis* (GDM1), *K. variicola*  
34  
35 17 (GMD41) and *E. rectale* (GDM34)] were positively correlated with blood glucose levels, while  
36  
37 18 most control-enriched MLGs were negatively correlated with blood glucose levels (Figure 4a). At  
38  
39 19 the species level, *Eggerthella* spp., *Megamonas* spp., *Allofustis seminis* and several species in  
40  
41 20 *Lachnospiraceae* and *Parabacteroides* were positively correlated with glucose tolerance, while  
42  
43 21 several *Alistipes* spp. were negatively correlated with glucose tolerance (Figure 4b).

#### 44 23 **Functional characterization of gut microbiota in GDM**

45 24 Next, we utilized KEGG pathway comparisons to explore potential differences in the functional  
46  
47 25 composition of the microbiome of GDM patients vs. controls. Although the functional  
48  
49 26 composition of GDM patients and controls were highly similar (Figure 5a), the microbiome of  
50  
51 27 GDM patients showed a greater abundance in pathways of membrane transport and energy  
52  
53 28 metabolism, while the microbiome of controls had higher abundance in amino acid metabolic  
54  
55 29 pathways. We also found that the KEGG modules, including the phosphotransferase system (PTS)  
56  
57 30 and lipopolysaccharide (LPS) biosynthesis and export systems, were associated with glucose

1 tolerance levels (Figure 5b).

### 2 3 **Gut microbiota-based prediction of GDM**

4 Finally, we utilized random forest models to assess the predictive ability of MLGs and species  
5 abundance profiles for GDM status. We found that certain 20 MLGs provided the best  
6 discriminatory power, as indicated by the area under the ROC curve (AUC) 0.91 (95% CI  
7 0.87-0.96), which was higher than that achieved using species profiles with this model (the best  
8 AUC was 0.80; 95% CI 0.73-0.86) using 40 species (Figure 6a). The increased AUC for the  
9 MLG-based model may be due to the fact that MLGs furnish taxonomic and functional  
10 information for unknown or unanalyzable species. Bacterial species providing the highest  
11 discriminatory power were primarily members of the *Bacteroides* or *Parabacteroides* genera  
12 (Figure 6b-c), consistent with our observation that *Parabacteroides* is the predominant genus  
13 accounting for differences in the gut microbiome between GDM patients and controls (Figure 1b).  
14 Although PBMI is a predictor of GDM, it did not substantially improve the performance of MLGs.  
15 (Figure 6d and Figure S3).

### 16 17 **Potential Implications**

18 The gut microbiome can be considered both as an endocrine and metabolic organ, the dysfunction  
19 of which plays important roles in disease development. During gestation, profound hormonal,  
20 immunological and metabolic changes take place [19-21]. Our findings suggest that gut  
21 microbiota in pregnant women are sensitive to subtle changes in metabolism and increases in  
22 blood glucose levels. When taken together with results from previous studies on T2D [22], our  
23 findings suggest gut microbiota may be a potential predictor of T2D after pregnancy. Furthermore,  
24 data from our cohort indicate that women diagnosed with GDM also suffered from moderate gut  
25 bacterial dysbiosis and functional dysbiosis that was not restricted to certain microbial species.  
26 Although causality has not been demonstrated, it raises the possibility that susceptibility of  
27 postpartum metabolic (e.g. T2D) and immune dysfunction might be modified by reconditioning of  
28 gut microbiota. Given that the gut microflora can be modified by diet, altering the composition of  
29 gut microbiota in pregnant women may improve diabetes related outcomes. Future studies should  
30 explore how gut bacterial dysbiosis could be improved and evaluate the efficacy of potential

**Commented [NN1]:** Please add this section:

Authors should provide some additional comments about potential, more broad-ranging implications of their work that are not directly related to the current focus of their manuscript. This section is meant to promote discussion on possible ways the findings or data presented might be used in or have a relationship with other areas of research that may not be directly apparent in the work. It is not meant to provide 'proof of importance' of the work. Only to engender expansion of use to other areas.

Explicit personal opinions by the authors are permitted, but they should be made clear as such. References or related information to support the propositions should be included. These section should focus on work that can be done within the foreseeable future and specifically using the information within the manuscript, not provide speculation on how it will relate to far-reaching goals of the research area.

**Reply:** done as requested

1 interventions, such as probiotics and dietary manipulation among pregnant women.

### 2 3 **Discussion**

4 In the present metagenomics study, we observed associations between gut microbiome and GDM  
5 status. Specifically, *Parabacteroides distasonis*, *Klebsiella variicola*, etc. were enriched in GDM  
6 patients, whereas *Methanobrevibacter smithii*, *Alistipes* spp., *Bifidobacterium* spp. and  
7 *Eubacterium* spp. were enriched in controls. The distribution of MLGs in GDM patients differed  
8 from that in the control group. Functional analysis showed a greater abundance of membrane  
9 transport, energy metabolism pathways, lipopolysaccharide and phosphotransferase systems in the  
10 microbiome of GDM patients, while the microbiome of controls was enriched in the amino acid  
11 metabolic pathways (Figure 7). To our knowledge, this is the first metagenomics study exploring  
12 roles of microbiota in the development of GDM.

13 Previous studies have shown the GDM-enriched bacteria that observed in our study are  
14 involved in gut flora dysbiosis. For example, GDM-enriched *Bacteroides* spp. and  
15 *Parabacteroides distasonis* are considered to be opportunistic pathogens in infectious diseases,  
16 with potential for developing antimicrobial drug resistance [23]. The family *Enterobacteriaceae*  
17 also occurred with a higher relative abundance in GDM patients than in healthy controls, which  
18 indicates a status of gut flora dysbiosis that may lead to a series of chronic diseases, such as colitis  
19 [24], Crohn's disease and acute cholecystitis [25]. Previous studies have shown that  
20 *Enterobacteriaceae* instigate inflammation to induce colitis [24], and the endotoxin-producing  
21 bacterium *Enterobacter* contributed to the development of obesity in gnotobiotic mice [26].

22 The decreased microbes in GDM patients included *Bifidobacterium* spp. (including *B.*  
23 *pseudocatenulatum*, *B. animalis* and one unclassified MLG), *Eubacterium* spp. (*E. siraeum*, *E.*  
24 *eligens* and two unclassified *Eubacterium* MLGs) and *Roseburia* spp. (Tables S2 and S3). Similar  
25 findings were reported in previous studies on a variety of chronic diseases, including T2D [22],  
26 liver cirrhosis [27], Crohn's disease [28] and ulcerative colitis [29]. These bacteria can produce  
27 lactate or butyrate, which could regulate gut permeability and induce the gut inflammatory  
28 response that precedes the development of diabetes [30, 31].

29 Our data demonstrated the ratio of gross abundances of the GDM-enriched to control-enriched  
30 MLGs was positively correlated with blood glucose tolerance levels, suggesting that microbiome



1  
2  
3  
4  
5  
6  
7  
8  
9  
10  
11  
12  
13  
14  
15  
16  
17  
18  
19  
20  
21  
22  
23  
24  
25  
26  
27  
28  
29  
30  
31  
32  
33  
34  
35  
36  
37  
38  
39  
40  
41  
42  
43  
44  
45  
46  
47  
48  
49  
50  
51  
52  
53  
54  
55  
56  
57  
58  
59  
60  
61  
62  
63  
64  
65

1 dysbiosis might have a direct association with GDM pathophysiology. Functional analysis showed  
2 that the LPS biosynthesis and export systems were involved in regulation of glucose levels.  
3 Previous studies have shown that the higher systemic LPS levels were associated with low-grade  
4 chronic inflammation in obesity, metabolic syndrome and T2D [8, 32, 33]. Based on current  
5 knowledge, the possible pathways linking LPS levels to glucose metabolism may include the  
6 increases in intestinal permeability, the changes in the relative amounts of gram negative vs. gram  
7 positive bacteria and a low-grade chronic inflammatory state. LPS is a bacterial cell wall  
8 component in gram-negative bacteria and can stimulate an inflammatory response [34, 35]. Gut  
9 microbiome dysbiosis can facilitate LPS entry into the systemic circulation through increasing gut  
10 permeability, which leads to inflammation and metabolic dysfunction [36]. Our results were  
11 concordant with a previous report [22] which found that gut microbiota dysbiosis in T2D was  
12 characterized by a decrease in gram-positive butyrate producing *Clostridium* species that lack LPS  
13 and an increase in gram-negative opportunistic pathogens including some *Bacteroidetes* and  
14 *Proteobacteria* species that contain LPS. The functional analysis in the present study found that  
15 membrane transport, energy metabolic and PTS pathways were enriched in the GDM patients.  
16 PTS pathways are responsible for transporting glucose through outer and inner membranes and  
17 catalyzing the uptake of carbohydrates. The increased relative abundance of these pathways may  
18 indicate gut environment of a GDM status may stimulate bacterial accelerated usage of glucose as  
19 energy.

20 There were several limitations in our study. First, the sample size is relatively small. Second, we  
21 only analyzed one stool sample per participant, which was collected in the second trimester of  
22 pregnancy. It is well known that immune and metabolic changes occur throughout pregnancy, and  
23 that the gut microbiota shifts from first to third trimesters [16]. In the present study, we are unable  
24 to clarify the causal relationship between the microbiome and the development of GDM due to the  
25 cross-sectional design. Consequently, data at multiple time points are needed to provide further  
26 insights into their dynamic relationship. Third, we did not have information on several factors  
27 such as life style and diet may further affect both blood glucose levels and gut microbiota  
28 composition. In order to more confirm the associations observed in the current study, a large  
29 prospective cohort investigation, with analysis of other potentially significant variables, will be  
30 necessary. Besides, due to the lack of serum samples, we could not measure LPS levels and

1  
2  
3  
4  
5  
6  
7 1 describe the real endotoxemia level of the patients.

8 2 In summary, this is the first study to demonstrate an association between the gut microbiota  
9 3 dysbiosis, functional changes and GDM. Our findings contribute to the understanding of GDM  
10 4 pathophysiology and may have important implications for identifying patients at risk for  
11 5 development of GDM.  
12 6

## 16 7 **Methods**

### 18 8 **Study population and sampling**

19 9 As part of the Born in Guangzhou Cohort Study (BIGCS) [37], fecal samples were obtained  
20 10 from 298 pregnant women during their second trimester in Guangzhou Women and Children's  
21 11 Medical Center (GWCMC) between 1st August, 2012 and 31st Aug, 2013. The inclusion criteria  
22 12 of current study were as follows: 1) without diseases which might affect glucose metabolism or  
23 13 microbiome composition such as pre-pregnancy diabetes, hypertension, thyroid disorders, asthma,  
24 14 lipid metabolic disorders, inflammatory bowel disease, irritable bowel syndrome and celiac  
25 15 disease; 2) had not received any antibiotic treatment 1 month before sample collection; 3) had not  
26 16 taken probiotics 2 weeks before sample collection. Of the 287 eligible women, 43 had a diagnosis  
27 17 of GDM and were included in the present study as the case group, and 81 women of non-GDM  
28 18 were randomly selected as the control group. Basic characteristics of the 124 pregnant women  
29 19 included in the study are summarized in Table S1. Compared to non GDM women, women with  
30 20 GDM were more likely to be older and multiparous and have higher pre-pregnant weight,  
31 21 pre-pregnancy body mass index (BMI) , gestational weight gain during pregnancy and premature  
32 22 delivery incidence. Fecal samples were frozen at -20°C freezers immediately (within 30 minutes)  
33 23 and transferred to -80 °C freezers within 24 hours after collected.

34 24 This study received approval from the Ethics Committee of GWCMC, and written informed  
35 25 consent was obtained from all participating pregnant women. Participants underwent a standard 2h  
36 26 75g oral glucose tolerance test (OGTT) between 21–29 weeks' gestation by collection of 2ml  
37 27 blood samples fasting, 1h, and 2h after a 75g glucose load, using NaF/EDTA tubes. After  
38 28 centrifugation, plasma glucose was measured by a hexokinase method using Beckman Coulter  
39 29 AU5800 automatic analyzer (Beckman Coulter, California, US). The laboratory previously

1  
2  
3  
4  
5  
6  
7  
8  
9  
10  
11  
12  
13  
14  
15  
16  
17  
18  
19  
20  
21  
22  
23  
24  
25  
26  
27  
28  
29  
30  
31  
32  
33  
34  
35  
36  
37  
38  
39  
40  
41  
42  
43  
44  
45  
46  
47  
48  
49  
50  
51  
52  
53  
54  
55  
56  
57  
58  
59  
60  
61  
62  
63  
64  
65

1 achieved ISO15189 certification by China National Accreditation Service for Conformity  
2 Assessment. GDM was defined using the Chinese diagnostic criteria [38], which is in agreement  
3 with the one-step approach endorsed by the American Diabetes Association [39]. Pregnant women  
4 were diagnosed as having GDM if one or more of the following glucose levels were elevated:  
5 fasting  $\geq 5.1$  mmol/L, 1h  $\geq 10.0$  mmol/L, and 2h  $\geq 8.5$  mmol/L [38]. None of these women was  
6 treated with insulin or glyburide. Maternal age, pre-pregnancy weight and height were extracted  
7 from clinical records of the Hospital Information Systems (HIS) used in GWCMC. Pre-pregnancy  
8 body mass index (PBMI) was calculated from height and weight information.

9  
10 **DNA extraction and metagenomic sequencing**

11 Total bacterial DNA was extracted from about 180-200 mg of feces using Qiagen QIAamp DNA  
12 Stool Mini Kit (Qiagen) following the manufacturer's instructions [40]. Extracted DNA of each  
13 sample was kept frozen at  $-20^{\circ}\text{C}$  until used. Illumina HiSeq 2000 was used to sequence the  
14 samples. We constructed a paired-end library with insert size of 350 base pairs (bp) for every  
15 sample, and sequenced with 100bp read length from each end. Illumina sequencing reads for fecal  
16 samples from pregnant women were independently processed for quality control using FASTAX  
17 Toolkit[41]. The following criteria were used for quality control: (1) reads were removed if they  
18 contain more than 3 N bases or more than 50 bases with low quality ( $<Q20$ ); (2) reads were  
19 trimmed in the end with low quality ( $<Q20$ ) or assigned as N. The remaining reads were then  
20 mapped to the human genome using SOAPalinger2 (SOAPaligner/soap2 ,  
21 RRID:SCR\_005503) [42] to remove contaminating human DNA. After QC, an average of 1.9%  
22 of low-quality or human genome reads were removed for the 124 samples.

23 **De novo assembly, gene calling and gene catalogue construction**

24 To determine the best assembling method for the obtained high-quality Illumina sequencing reads,  
25 we compared the performance of two assemblers, SOAPdenovo v2.04 (SOAPdenovo2 ,  
26 RRID:SCR\_014986) (as previously used in the MetaHIT and IGC projects) [43, 44] and  
27 IDBA-UD v1.1.1 (a *de novo* assembler for metagenomic sequences) [45]. For the SOAPdenovo,  
28 we tested the k-mer length ranging from 23bp to 123bp by 10bp step for each sample, and selected  
29 the assembled contig set with longest N50 length. For the IDBA-UD, parameters "--mink 21  
30 --maxk 81 --step 20 --pre\_correction" were used. For most samples, IDBA-UD obtained a better

1  
2  
3  
4  
5  
6  
7  
8  
9  
10  
11  
12  
13  
14  
15  
16  
17  
18  
19  
20  
21  
22  
23  
24  
25  
26  
27  
28  
29  
30  
31  
32  
33  
34  
35  
36  
37  
38  
39  
40  
41  
42  
43  
44  
45  
46  
47  
48  
49  
50  
51  
52  
53  
54  
55  
56  
57  
58  
59  
60  
61  
62  
63  
64  
65

1 assembled contig set than SOAPdenovo. This could be attributable to the relative efficiency of  
2 IDBA-UD in assembling bacterial genomes within regions of highly uneven depth in  
3 metagenomic samples. As a result, we obtained an average  $197.9 \pm 50.3$  Mbp (mean  $\pm$  SD) contig  
4 sets for each pregnant women sample, with N50 length  $8.8 \pm 3.9$  kbp. Unassembled reads from  
5 these samples were pooled and re-assembled by using IDBA-UD for further analysis.

6 Genes were predicted by MetaGeneMark [46] based on parameter exploration by the MOCAT  
7 pipeline (MOCAT, RRID:SCR\_011943) [47]. A non-redundant gene catalogue of pregnant women  
8 samples was constructed using CD-HIT (CD-HIT, RRID:SCR\_007105) [48], through which,  
9 genes with >90% overlap and >95% nucleic acid similarity (no gap allowed) were removed as  
10 redundancies. A pregnant women gene catalogue containing 4,344,984 non-redundant genes was  
11 generated for fecal samples collected from these 124 pregnant women. This gene catalogue was  
12 further combined with the previous integrated gene catalogue (IGC) [44] by removing  
13 redundancies (2,621,398 genes) in the same manner as above. In the end, 39.6% (1,723,586) of the  
14 genes in the pregnant women gene catalogue were identified as novel.

15  
16 **Quantification of metagenomic genes**

17 The abundance of genes in the combined non-redundant gene catalogue (combining the pregnant  
18 women gene catalogue and IGC) was quantified as relative abundance of reads. First, high-quality  
19 reads from each sample were aligned against the gene catalogue using SOAP2.21 [42], with  
20 thresholds that allowed a maximum of two mismatches in the initial 32bp seed sequence and 90%  
21 similarity over the whole reads. Only two types of alignments were accepted: (1) the entire  
22 paired-end read can be mapped onto a gene with the correct insert-size; (2) one end of the  
23 paired-end read can be mapped onto the end of a gene, only if the other end of read was mapped  
24 outside the genic region. The relative abundance of a gene in a sample was estimated by dividing  
25 the number of reads that uniquely mapped to that gene by the length of the gene region and by the  
26 total number of reads from the sample that uniquely mapped to any gene in the catalogue. The  
27 resulting set of gene relative abundances of a sample was its gene profile.

28  
29 **Richness**

30 We used the gene count and Shannon index to represent the richness and evenness of the gut

1  
2  
3  
4  
5  
6  
7  
8  
9  
10  
11  
12  
13  
14  
15  
16  
17  
18  
19  
20  
21  
22  
23  
24  
25  
26  
27  
28  
29  
30  
31  
32  
33  
34  
35  
36  
37  
38  
39  
40  
41  
42  
43  
44  
45  
46  
47  
48  
49  
50  
51  
52  
53  
54  
55  
56  
57  
58  
59  
60  
61  
62  
63  
64  
65

1 microbiota for each sample. As defined previously [5], the gene counts of a metagenomic sample  
2 were calculated based on their reads mapping number on the non-redundant gene catalogue. To  
3 eliminate the influence of sequencing depth fluctuation, an equal number of 11 million reads for  
4 all samples were randomly extracted for mapping, and then, the mean number of genes over 30  
5 random drawings was generated. The Shannon index (within sample diversity) was calculated as  
6 previously described [22].

### 7 8 **Taxonomical and functional analyses**

9 **Taxonomical classification of genes.** Reference microbial genomes were downloaded from the  
10 NCBI-genome database (version May-2015), which included 8,953 bacterial/archaea genomes (of  
11 which, 2,785 genomes were complete and 6,168 were draft genomes), and 4,400 viral genomes.  
12 Genes from the non-redundant gene catalogue were aligned to reference genomes using BLASTN  
13 (BLASTN, RRID:SCR\_001598) with parameters “-word\_size 16 -evalue 1e-10 -max\_target\_seqs  
14 5000”. At least 70% alignment coverage of each gene was needed. Based on the parameter  
15 exploration of sequence similarity across phylogenetic ranks [49], we used 85% identity as the  
16 threshold for genus assignment, and 65% for phylum assignment.

17 **Functional annotation of genes.** The Kyoto Encyclopedia of Genes and Genomes (KEGG  
18 orthologous, version Apr-2015) (KEGG, RRID:SCR\_012773) and evolutionary genealogy of  
19 genes: Non-supervised Orthologous Groups (eggNOG, v4) databases (eggNOG,  
20 RRID:SCR\_002456) were used for functional annotation of genes. Translated amino acid  
21 sequences of genes were searched against these databases using USEARCH v8.0.1616 [50]  
22 (evalue < 1e-5, query\_cov > 0.70) with a minimum similarity of 30%. Each protein was assigned a  
23 KEGG orthologue (KO) or eggNOG orthologue group (OG) based on the best-hit gene in the  
24 database. Using this approach, 43.6% and 71.9% of the genes in the combined gene catalogue  
25 could be assigned a KO or OG, respectively. As a final step, the abundance profiles of KEGG and  
26 eggNOG were calculated by summing up the relative abundance of genes annotated to a feature.

### 27 28 **Metagenome-wide association study (MGWAS)**

29 We used the MGWAS methodology to identify gene markers that showed significant abundance  
30 differences between the GDM and control individuals. The MGWAS was performed using

1 methodology developed by Qin et al [22]. Briefly, gene relative abundance profiles were initially  
2 adjusted for population stratifications using the modified EIGENSTRAT method [51] that allows  
3 the use of covariance matrices estimated from abundance levels instead of genotypes. Then, a  
4 two-tailed Mann-Whitney U test was performed in the adjusted gene profiles, and the  
5 Benjamin-Hochberg procedure [52] was subsequently used to correct the p-values to generate the  
6 false discovery rate (FDR, known as “q-value”) for each gene.

### 7 8 **Metagenomic linkage group (MLG) analysis**

9 Co-abundance genes were clustered into MLGs based on the previously described methodology  
10 [22]. Taxonomic assignment and abundance profiling of the MLGs were performed according to  
11 the taxonomy and the relative abundance of their constituent genes as previously described [22].  
12 Briefly, assignment to species requires 90% of genes in an MLG to align with the species’ genome  
13 with 95% identity and 70% overlap of query. Assigning an MLG to a genus requires 80% of its  
14 genes to align with a genome with 85% identity in both DNA and protein sequences. MLGs were  
15 further interconnected according to Spearman’s correlation coefficient ( $\rho > 0.4$  or  $\rho < -0.4$ ) between  
16 their abundances in all GMD and control samples, and the co-occurrence network of MLGs was  
17 visualized by Cytoscape 3.0.2 (Cytoscape, RRID:SCR\_003032) [53]. The direction of enrichment  
18 was determined by the Mann-Whitney U test ( $p < 0.05$ ).

### 19 20 **Statistical analysis**

21 Statistical analysis was implemented using the R platform. Distance-based redundancy analysis  
22 (dbRDA) was performed using the “vegan” package [54] based on the Bray-Curtis distances on  
23 normalized taxa relative abundance matrices, then visualized using the “ggplot2” package.  
24 Permutational multivariate analysis of variance (PERMANOVA) was performed using the  
25 “vegan” package, and the permuted  $p$ -value was obtained by 10,000 permutations.

26 The Random Forest model has been shown [6] to be a suitable model for exploiting  
27 metagenomic data. Random Forest models were trained using the “randomForest” package  
28 (default parameters and 10,000 trees) to identify GDM status in a subset of GDM patients and  
29 control group by using the abundance profiles of species and MLGs. Performance of the  
30 predictive model was evaluated with cross-validation error. Variable importance by mean decrease

1  
2  
3  
4  
5  
6  
7  
8  
9  
10  
11  
12  
13  
14  
15  
16  
17  
18  
19  
20  
21  
22  
23  
24  
25  
26  
27  
28  
29  
30  
31  
32  
33  
34  
35  
36  
37  
38  
39  
40  
41  
42  
43  
44  
45  
46  
47  
48  
49  
50  
51  
52  
53  
54  
55  
56  
57  
58  
59  
60  
61  
62  
63  
64  
65

1 in accuracy was calculated for the Random Forest models using the full set of species or MLGs.  
2 Based on the rank of variables by importance, concise models were constructed that contained  
3 only the most important variables.

4 Receiver operator characteristic (ROC) analysis was performed using the “pROC” package, we  
5 then computed the 95% confidence interval (CI) of the area under the ROC curve (AUC) with  
6 10,000 bootstrap replicates to assess the variability of the measure. Rarefaction analysis was  
7 performed to assess the gene richness of metagenomic samples, implemented by in-house Perl  
8 scripts.

### Availability of supporting data and materials

9 All raw sequencing data has been deposited in the EBI Sequence Read Archive (SRA) under  
10 accession number ERP020710. Further supporting data is available in the GigaScience repository,  
11 GigaDB [REF#]

### Abbreviations

14 MLGs, metagenome linkage groups; GDM, gestational diabetes mellitus;  
15 MGWAS, Metagenome-wide association study;  
16 PTS, phosphotransferase system; LPS, lipopolysaccharide; T2D, type 2 diabetes.

### Competing interests

19 The authors declare that they have no competing interests.

### Funding

22 This study is supported by the National Natural Science Foundation of China (81673181),  
23 Guangzhou Science and Technology Bureau, Guangzhou, China (201508030037), and Shenzhen  
24 Municipal Government of China (JSGG20140702161403250, CXB201108250098A and  
25 JSGG20160229172752028). The sponsors had no role in design and conduct of the study;  
26 collection, management, analysis, and interpretation of the data; or in preparation, review, or  
27 approval of the manuscript; or the decision to submit the manuscript for publication.

### Authors' contributions

30 XQ and HX designed the birth cohort on which this study was based. XQ and HX designed the

**Commented [NN2]:** Please add this section –  
**Note that All the raw sequencing data needs to be deposited in the SRA and the accession numbers quoted in the manuscript.**  
highlighting that supporting data is available in the GigaScience repository, GigaDB [Ref#]  
**Reply:** done as requested

**Commented [NN3]:** Please list all abbreviations used more than once in alphabetical order.  
**Reply:** done as requested

**Commented [NN4]:** Please declare all competing interests or state “The authors’ declare that they have no competing interests”.  
**Reply:** done as requested

**Commented [NN5]:** All sources of funding for the research reported should be declared. The role of the funding body in the design of the study and collection, analysis, and interpretation of data and in writing the manuscript should be declared. Please use [FundRef](#) to report funding sources and include the award/grant number, and the name of the Principal Investigator of the grant.  
**Reply:** done as requested

**Commented [NN6]:** The individual contributions of authors to the manuscript should be specified in this section. Guidance and criteria for authorship can be found in our [editorial policies](#). We would recommend you follow some kind of standardised taxonomy like the [CASRAI CRediT](#) (Contributor Roles Taxonomy).  
**Reply:** done as requested

1 study and directed its implementation. YK, MY, JH, JL\*, NC, WX, SS, LQ, YW, CH, QC, WL and  
2 YW were involved in study design and sample collection. YK, JL\* and SL analyzed the data and  
3 drafted the manuscript. XQ, HD, JL and CP revised the manuscript. All authors critically revised  
4 the manuscript, and approved the final version. JL\* represents Jin-Hua Lu.

#### Acknowledgements

5  
6 We thank all the pregnant women who participated in the Born in Guangzhou Cohort Study and  
7 all staff in the cohort team for their contribution to this study, particularly the research nurses and  
8 midwives and other recruiting staff for their excellent work.

#### Reference

1. Ferrara A: **Increasing prevalence of gestational diabetes mellitus: a public health perspective.** *Diabetes care* 2007, **30** Suppl 2:S141-146.
2. Landon MB, Gabbe SG: **Gestational diabetes mellitus.** *Obstetrics and gynecology* 2011, **118**(6):1379-1393.
3. Kim C, Newton KM, Knopp RH: **Gestational diabetes and the incidence of type 2 diabetes: a systematic review.** *Diabetes care* 2002, **25**(10):1862-1868.
4. Allalou A, Nalla A, Prentice KJ, Liu Y, Zhang M, Dai FF, Ning X, Osborne LR, Cox BJ, Gunderson EP *et al*: **A Predictive Metabolic Signature for the Transition From Gestational Diabetes Mellitus to Type 2 Diabetes.** *Diabetes* 2016, **65**(9):2529-2539.
5. Le Chatelier E, Nielsen T, Qin J, Prifti E, Hildebrand F, Falony G, Almeida M, Arumugam M, Batto JM, Kennedy S *et al*: **Richness of human gut microbiome correlates with metabolic markers.** *Nature* 2013, **500**(7464):541-546.
6. Karlsson FH, Tremaroli V, Nookaew I, Bergstrom G, Behre CJ, Fagerberg B, Nielsen J, Backhed F: **Gut metagenome in European women with normal, impaired and diabetic glucose control.** *Nature* 2013, **498**(7452):99-103.
7. Karlsson F, Tremaroli V, Nielsen J, Backhed F: **Assessing the human gut microbiota in metabolic diseases.** *Diabetes* 2013, **62**(10):3341-3349.
8. Cani PD, Neyrinck AM, Fava F, Knauf C, Burcelin RG, Tuohy KM, Gibson GR, Delzenne NM: **Selective increases of bifidobacteria in gut microflora improve high-fat-diet-induced diabetes in mice through a mechanism associated with endotoxaemia.** *Diabetologia* 2007, **50**(11):2374-2383.
9. Chu SY, Callaghan WM, Kim SY, Schmid CH, Lau J, England LJ, Dietz PM: **Maternal obesity and risk of gestational diabetes mellitus.** *Diabetes care* 2007, **30**(8):2070-2076.
10. Hedderon MM, Williams MA, Holt VL, Weiss NS, Ferrara A: **Body mass index and weight gain prior to pregnancy and risk of gestational diabetes mellitus.** *American journal of obstetrics and gynecology* 2008, **198**(4):409 e401-407.

**Commented [NN7]:** Please acknowledge anyone who contributed towards the article who does not meet the criteria for authorship including anyone who provided professional writing services or materials.

Authors should obtain permission to acknowledge from all those mentioned in the Acknowledgements section. If you do not have anyone to acknowledge, please write "Not applicable" in this section.

**Reply:** done as requested

**Commented [NN8]:** Please move all URLs in the main paper to the reference list. Then renumber the references list in the paper and below.

**Reply:** done as requested



1  
2  
3  
4  
5  
6  
7  
8  
9  
10  
11  
12  
13  
14  
15  
16  
17  
18  
19  
20  
21  
22  
23  
24  
25  
26  
27  
28  
29  
30  
31  
32  
33  
34  
35  
36  
37  
38  
39  
40  
41  
42  
43  
44  
45  
46  
47  
48  
49  
50  
51  
52  
53  
54  
55  
56  
57  
58  
59  
60  
61  
62  
63  
64  
65

11. Pedersen HK, Gudmundsdottir V, Nielsen HB, Hyotylainen T, Nielsen T, Jensen BA, Forslund K, Hildebrand F, Prifti E, Falony G *et al*: **Human gut microbes impact host serum metabolome and insulin sensitivity.** *Nature* 2016, **535**(7612):376-381.

12. Collado MC, Isolauri E, Laitinen K, Salminen S: **Distinct composition of gut microbiota during pregnancy in overweight and normal-weight women.** *The American journal of clinical nutrition* 2008, **88**(4):894-899.

13. Vrieze A, Van Nood E, Holleman F, Salojarvi J, Kootte RS, Bartelsman JF, Dallinga-Thie GM, Ackermans MT, Serlie MJ, Oozeer R *et al*: **Transfer of intestinal microbiota from lean donors increases insulin sensitivity in individuals with metabolic syndrome.** *Gastroenterology* 2012, **143**(4):913-916 e917.

14. Turnbaugh PJ, Ley RE, Mahowald MA, Magrini V, Mardis ER, Gordon JI: **An obesity-associated gut microbiome with increased capacity for energy harvest.** *Nature* 2006, **444**(7122):1027-1031.

15. England LJ, Dietz PM, Njoroge T, Callaghan WM, Bruce C, Buus RM, Williamson DF: **Preventing type 2 diabetes: public health implications for women with a history of gestational diabetes mellitus.** *American journal of obstetrics and gynecology* 2009, **200**(4):365 e361-368.

16. Koren O, Goodrich JK, Cullender TC, Spor A, Laitinen K, Backhed HK, Gonzalez A, Werner JJ, Angenent LT, Knight R *et al*: **Host remodeling of the gut microbiome and metabolic changes during pregnancy.** *Cell* 2012, **150**(3):470-480.

17. Gomez-Arango LF, Barrett HL, McIntyre HD, Callaway LK, Morrison M, Dekker Nitert M, Group ST: **Connections Between the Gut Microbiome and Metabolic Hormones in Early Pregnancy in Overweight and Obese Women.** *Diabetes* 2016, **65**(8):2214-2223.

18. Wang J, Jia H: **Metagenome-wide association studies: fine-mining the microbiome.** *Nature reviews Microbiology* 2016, **14**(8):508-522.

19. Lain KY, Catalano PM: **Metabolic changes in pregnancy.** *Clinical obstetrics and gynecology* 2007, **50**(4):938-948.

20. Mor G, Cardenas I: **The immune system in pregnancy: a unique complexity.** *American journal of reproductive immunology* 2010, **63**(6):425-433.

21. Newbern D, Freemark M: **Placental hormones and the control of maternal metabolism and fetal growth.** *Current opinion in endocrinology, diabetes, and obesity* 2011, **18**(6):409-416.

22. Qin J, Li Y, Cai Z, Li S, Zhu J, Zhang F, Liang S, Zhang W, Guan Y, Shen D *et al*: **A metagenome-wide association study of gut microbiota in type 2 diabetes.** *Nature* 2012, **490**(7418):55-60.

23. Boente RF, Ferreira LQ, Falcao LS, Miranda KR, Guimaraes PL, Santos-Filho J, Vieira JM, Barroso DE, Emond JP, Ferreira EO *et al*: **Detection of resistance genes and susceptibility patterns in Bacteroides and Parabacteroides strains.** *Anaerobe* 2010, **16**(3):190-194.

24. Garrett WS, Gallini CA, Yatsunencko T, Michaud M, DuBois A, Delaney ML, Punit S, Karlsson M, Bry L, Glickman JN *et al*: **Enterobacteriaceae act in concert with the gut microbiota to induce spontaneous and maternally transmitted colitis.** *Cell host & microbe* 2010, **8**(3):292-300.

25. Liu J, Yan Q, Luo F, Shang D, Wu D, Zhang H, Shang X, Kang X, Abdo M, Liu B *et al*: **Acute cholecystitis associated with infection of Enterobacteriaceae from gut microbiota.** *Clinical microbiology and infection : the official publication of the European Society of Clinical Microbiology and Infectious Diseases* 2015, **21**(9):851 e851-859.

1  
2  
3  
4  
5  
6  
7  
8  
9  
10  
11  
12  
13  
14  
15  
16  
17  
18  
19  
20  
21  
22  
23  
24  
25  
26  
27  
28  
29  
30  
31  
32  
33  
34  
35  
36  
37  
38  
39  
40  
41  
42  
43  
44  
45  
46  
47  
48  
49  
50  
51  
52  
53  
54  
55  
56  
57  
58  
59  
60  
61  
62  
63  
64  
65

26. Fei N, Zhao L: **An opportunistic pathogen isolated from the gut of an obese human causes obesity in germfree mice.** *The ISME Journal* 2013, **7**(4):880-884.

27. Qin N, Yang F, Li A, Prifti E, Chen Y, Shao L, Guo J, Le Chatelier E, Yao J, Wu L *et al*: **Alterations of the human gut microbiome in liver cirrhosis.** *Nature* 2014, **513**(7516):59-64.

28. Gevers D, Kugathasan S, Denson LA, Vazquez-Baeza Y, Van Treuren W, Ren B, Schwager E, Knights D, Song SJ, Yassour M *et al*: **The treatment-naive microbiome in new-onset Crohn's disease.** *Cell host & microbe* 2014, **15**(3):382-392.

29. Machiels K, Joossens M, Sabino J, De Preter V, Arijis I, Eeckhaut V, Ballet V, Claes K, Van Immerseel F, Verbeke K *et al*: **A decrease of the butyrate-producing species *Roseburia hominis* and *Faecalibacterium prausnitzii* defines dysbiosis in patients with ulcerative colitis.** *Gut* 2014, **63**(8):1275-1283.

30. Peng L, Li ZR, Green RS, Holzman IR, Lin J: **Butyrate enhances the intestinal barrier by facilitating tight junction assembly via activation of AMP-activated protein kinase in Caco-2 cell monolayers.** *The Journal of nutrition* 2009, **139**(9):1619-1625.

31. Vaarala O, Atkinson MA, Neu J: **The "perfect storm" for type 1 diabetes: the complex interplay between intestinal microbiota, gut permeability, and mucosal immunity.** *Diabetes* 2008, **57**(10):2555-2562.

32. Sun L, Yu Z, Ye X, Zou S, Li H, Yu D, Wu H, Chen Y, Dore J, Clement K *et al*: **A marker of endotoxemia is associated with obesity and related metabolic disorders in apparently healthy Chinese.** *Diabetes care* 2010, **33**(9):1925-1932.

33. Jayashree B, Bibin YS, Prabhu D, Shanthirani CS, Gokulakrishnan K, Lakshmi BS, Mohan V, Balasubramanyam M: **Increased circulatory levels of lipopolysaccharide (LPS) and zonulin signify novel biomarkers of proinflammation in patients with type 2 diabetes.** *Molecular and cellular biochemistry* 2014, **388**(1-2):203-210.

34. Manco M, Putignani L, Bottazzo GF: **Gut microbiota, lipopolysaccharides, and innate immunity in the pathogenesis of obesity and cardiovascular risk.** *Endocrine reviews* 2010, **31**(6):817-844.

35. Abreu MT: **Toll-like receptor signalling in the intestinal epithelium: how bacterial recognition shapes intestinal function.** *Nature reviews Immunology* 2010, **10**(2):131-144.

36. Brun P, Castagliuolo I, Di Leo V, Buda A, Pinzani M, Palu G, Martines D: **Increased intestinal permeability in obese mice: new evidence in the pathogenesis of nonalcoholic steatohepatitis.** *American journal of physiology Gastrointestinal and liver physiology* 2007, **292**(2):G518-525.

37. Qiu X, Lu J-H, He J-R, Lam K-bH, Shen S-Y, Guo Y, Kuang Y-S, Yuan M-Y, Qiu L, Chen N-N: **The Born in Guangzhou Cohort Study (BIGCS).** 2017.

38. Zhu WW, Yang HX: **Diagnosis of gestational diabetes mellitus in China.** *Diabetes Care* 2013, **36**(6):e76.

39. Association. AD: **Standards of medical care in diabetes--2011.** *Diabetes Care* 2011, **34** Suppl 1:S11-61.

40. Mirsepasi H, Persson S, Struve C, Andersen LO, Petersen AM, Krogfelt KA: **Microbial diversity in fecal samples depends on DNA extraction method: easyMag DNA extraction compared to QIAamp DNA stool mini kit extraction.** *BMC research notes* 2014, **7**:50.

41. **FASTAX Toolkit** .[http://hannonlab.cshl.edu/fastx\\_toolkit/](http://hannonlab.cshl.edu/fastx_toolkit/).

42. Li R, Yu C, Li Y, Lam TW, Yiu SM, Kristiansen K, Wang J: **SOAP2: an improved ultrafast tool for**

1  
2  
3  
4  
5  
6  
7  
8  
9  
10  
11  
12  
13  
14  
15  
16  
17  
18  
19  
20  
21  
22  
23  
24  
25  
26  
27  
28  
29  
30  
31  
32  
33  
34  
35  
36  
37  
38  
39  
40  
41  
42  
43  
44  
45  
46  
47  
48  
49  
50  
51  
52  
53  
54  
55  
56  
57  
58  
59  
60  
61  
62  
63  
64  
65

**short read alignment.** *Bioinformatics* 2009, **25**(15):1966-1967.

43. Li R, Zhu H, Ruan J, Qian W, Fang X, Shi Z, Li Y, Li S, Shan G, Kristiansen K *et al*: **De novo assembly of human genomes with massively parallel short read sequencing.** *Genome Res* 2010, **20**(2):265-272.

44. Li J, Jia H, Cai X, Zhong H, Feng Q, Sunagawa S, Arumugam M, Kultima JR, Prifti E, Nielsen T *et al*: **An integrated catalog of reference genes in the human gut microbiome.** *Nature biotechnology* 2014, **32**(8):834-841.

45. Peng Y, Leung HC, Yiu SM, Chin FY: **IDBA-UD: a de novo assembler for single-cell and metagenomic sequencing data with highly uneven depth.** *Bioinformatics* 2012, **28**(11):1420-1428.

46. Zhu W, Lomsadze A, Borodovsky M: **Ab initio gene identification in metagenomic sequences.** *Nucleic acids research* 2010, **38**(12):e132.

47. Kultima JR, Sunagawa S, Li J, Chen W, Chen H, Mende DR, Arumugam M, Pan Q, Liu B, Qin J *et al*: **MOCAT: a metagenomics assembly and gene prediction toolkit.** *PLoS one* 2012, **7**(10):e47656.

48. Li W, Godzik A: **Cd-hit: a fast program for clustering and comparing large sets of protein or nucleotide sequences.** *Bioinformatics* 2006, **22**(13):1658-1659.

49. Arumugam M, Raes J, Pelletier E, Le Paslier D, Yamada T, Mende DR, Fernandes GR, Tap J, Bruls T, Batto JM *et al*: **Enterotypes of the human gut microbiome.** *Nature* 2011, **473**(7346):174-180.

50. Edgar RC: **Search and clustering orders of magnitude faster than BLAST.** *Bioinformatics* 2010, **26**(19):2460-2461.

51. Price AL, Patterson NJ, Plenge RM, Weinblatt ME, Shadick NA, Reich D: **Principal components analysis corrects for stratification in genome-wide association studies.** *Nature genetics* 2006, **38**(8):904-909.

52. Storey JD: **A direct approach to false discovery rates** *Journal of the Royal Statistical Society: Series B (Statistical Methodology)* Volume 64, Issue 3. *Journal of the Royal Statistical Society: Series B (Statistical Methodology)* 2002, **64**(3):479-498.

53. Shannon P, Markiel A, Ozier O, Baliga NS, Wang JT, Ramage D, Amin N, Schwikowski B, Ideker T: **Cytoscape: a software environment for integrated models of biomolecular interaction networks.** *Genome research* 2003, **13**(11):2498-2504.

54. Dixon P: **VEGAN, a package of R functions for community ecology** *Journal of Vegetation Science* Volume 14, Issue 6. *Journal of Vegetation Science* 2003, **14**(6):927-930.

1  
2  
3  
4  
5  
6  
7  
8  
9  
10  
11  
12  
13  
14  
15  
16  
17  
18  
19  
20  
21  
22  
23  
24  
25  
26  
27  
28  
29  
30  
31  
32  
33  
34  
35  
36  
37  
38  
39  
40  
41  
42  
43  
44  
45  
46  
47  
48  
49  
50  
51  
52  
53  
54  
55  
56  
57  
58  
59  
60  
61  
62  
63  
64  
65

1  
2  
3  
4  
5  
6  
7  
8  
9  
10  
11  
12  
13  
14  
15  
16  
17  
18  
19  
20  
21  
22  
23  
24  
25  
26  
27  
28  
29  
30  
31  
32  
33  
34  
35  
36  
37  
38  
39  
40  
41  
42  
43  
44  
45  
46  
47  
48  
49  
50  
51  
52  
53  
54  
55  
56  
57  
58  
59  
60  
61  
62  
63  
64  
65

**Figure legends**

**Figure 1 | Difference in microbial composition between GDM and healthy pregnant women.**

(a) Distance-based redundancy analysis (dbRDA) based on Bray–Curtis distances between microbial genera, revealing a GDM dysbiosis which overlaps only in part with taxonomic composition in GDM patients and healthy controls. The first two principal components (PCs) and the ratio of variance contributed by them is shown. Lines connect samples in the same group, and colored circles cover the samples near the center of gravity for each group. Genus (blue square), as the main contributors, are plotted by their loading in the PCs. (b) Boxplot shows genera that differ significantly between GDM patients and healthy controls. Genera with  $q < 0.05$  (Mann-Whitney U test corrected by the Benjamini-Hochberg method) are shown. Red and green boxes represent GDM patients and healthy controls, respectively. Only the genera with average relative abundances greater than 0.05% in all the samples are shown for clarity. The boxes represent the interquartile range (IQR) between first and third quartiles and the line inside represents the median. The whiskers denote the lowest and highest values within 1.5 times IQR from the first and third quartiles, respectively. The circles represent outliers beyond the whiskers.

**Figure 2 | Interconnection of GDM-associated MLGs.**

A co-occurrence network deduced from GDM-enriched and control-enriched MLGs is shown. Nodes depict MLG's with their taxonomic assignment or ID shown. The size of each node indicates the number of genes within the MLG. Connecting lines represent Spearman correlation coefficient  $\rho > 0.40$  (gray line) or  $< -0.40$  (red line). Classified MLGs are colored (red: GDM-enriched; green: control-enriched) and grouped according to their taxonomic information. Only MLGs with  $> 100$  genes are shown for clarity of presentation and visualization, and the detailed information of all 129 MLGs are given in Table S2.

**Figure 3 | Association of gross abundance of GDM-enriched and control-enriched MLGs with blood glucose levels 0, 60, and 120 minutes after an oral glucose tolerance test.**

Scatter plots of all samples (including GDM patients and healthy controls) are shown with lines indicating linear fit.

1  
2  
3  
4  
5  
6  
7  
8  
9  
10  
11  
12  
13  
14  
15  
16  
17  
18  
19  
20  
21  
22  
23  
24  
25  
26  
27  
28  
29  
30  
31  
32  
33  
34  
35  
36  
37  
38  
39  
40  
41  
42  
43  
44  
45  
46  
47  
48  
49  
50  
51  
52  
53  
54  
55  
56  
57  
58  
59  
60  
61  
62  
63  
64  
65

1  
2  
3  
4  
5  
6  
7  
8  
9  
10  
11  
12  
13  
14  
15  
16  
17  
18  
19  
20  
21  
22  
23  
24  
25  
26  
27  
28  
29  
30  
31  
32  
33  
34  
35  
36  
37  
38  
39  
40  
41  
42  
43  
44  
45  
46  
47  
48  
49  
50  
51  
52  
53  
54  
55  
56  
57  
58  
59  
60  
61  
62  
63  
64  
65

**Figure 4 | Correlation of blood glucose levels 0, 60, and 120 minutes after an oral glucose tolerance test (only OGTT results are shown, I do not see the results for HbA1C in this figure) with MLGs (a) and species (b).** Spearman's rank correlation coefficients and P-values for the correlations are shown. '+' denotes  $P < 0.05$ ; '++' denotes  $P < 0.01$ . Only MLGs or species with average relative abundances greater than 0.001% and correlated ( $P < 0.05$ ) with at least one index are shown for clarity.

**Figure 5 | Association of microbial genetic functional pathway composition in GDM patients and healthy pregnant women.** (a) Distributions of relative abundances of KEGG pathway categories in GDM patients and healthy controls. '\*' denotes  $q < 0.05$  (Mann-Whitney U test corrected by the Benjamini-Hochberg method) (b) Correlation of blood glucose levels 0, 60, and 120 minutes after an oral glucose tolerance test, with PTS system and LPS biosynthesis and transport system. Spearman's rank correlation coefficients and P-values for the correlations are shown. '+' denotes  $P < 0.05$ ; '++' denotes  $P < 0.01$ .

**Figure 6 | Classification of GDM status by the relative abundance of MLGs and species.** (a) Classification performance of a random forest model using MLG or species abundance assessed by AUC. The performance was explored for different numbers of explanatory variables, ordered in importance. (b-c) The 30 most discriminant MLGs (b) and species (c) in the models classifying GDM and controls. The bar lengths in b and c indicate the importance of the variable, and colors represent enrichment in GDM (red shades) or controls (blue shades). (d) ROC analysis for classification of GDM status by MLGs and PBMI.

**Figure 7 | A schematic diagram showing the main bacteria and functions of the gut microbes that had a predicted GDM association.** Red and orange columns and text denotes enriched bacteria and their putative functions in GDM patients; green columns and text denotes depleted bacteria and their putative functions in GDM patients.

Figure 1

a

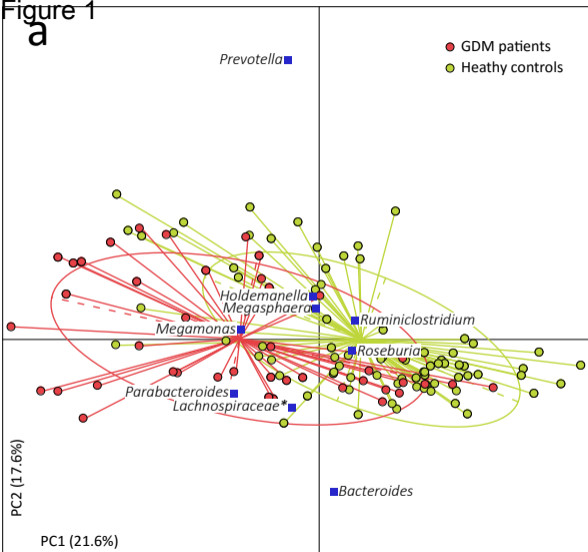

b

[Click here to download Figure Figure 1.pdf](#)
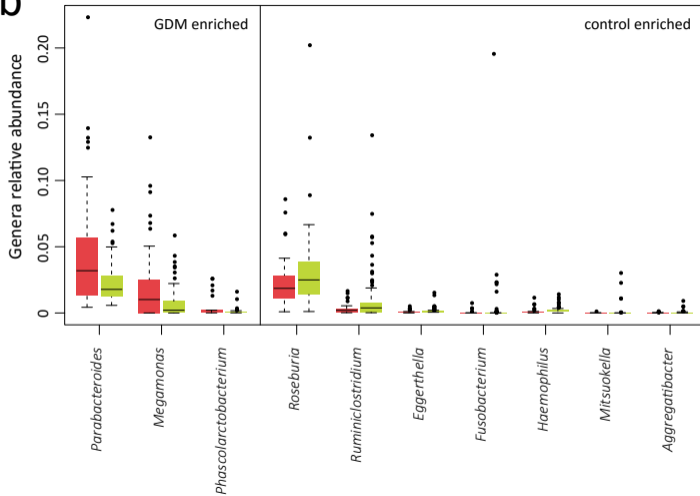

Figure 2

Control-enriched MLGs

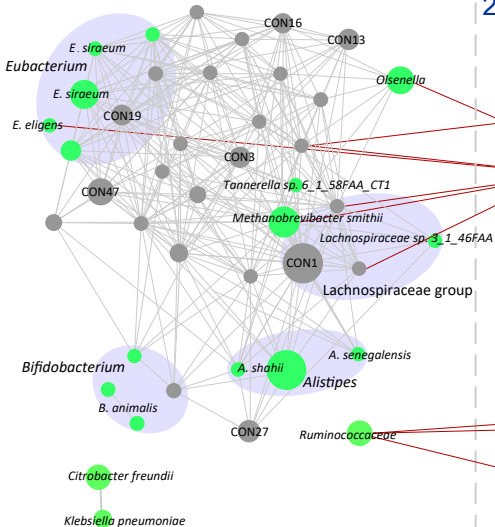

Click here to download Figure 2.update.pdf

GDM-enriched MLGs

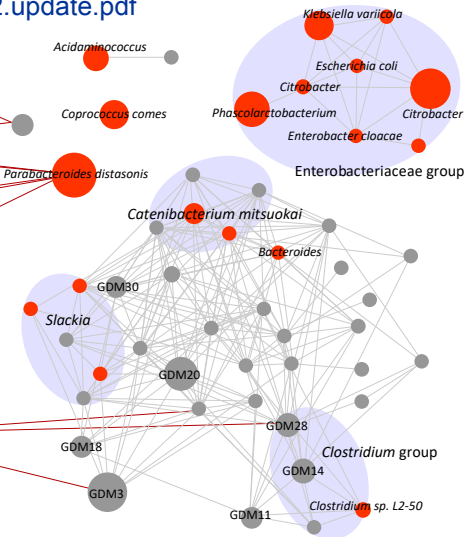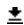

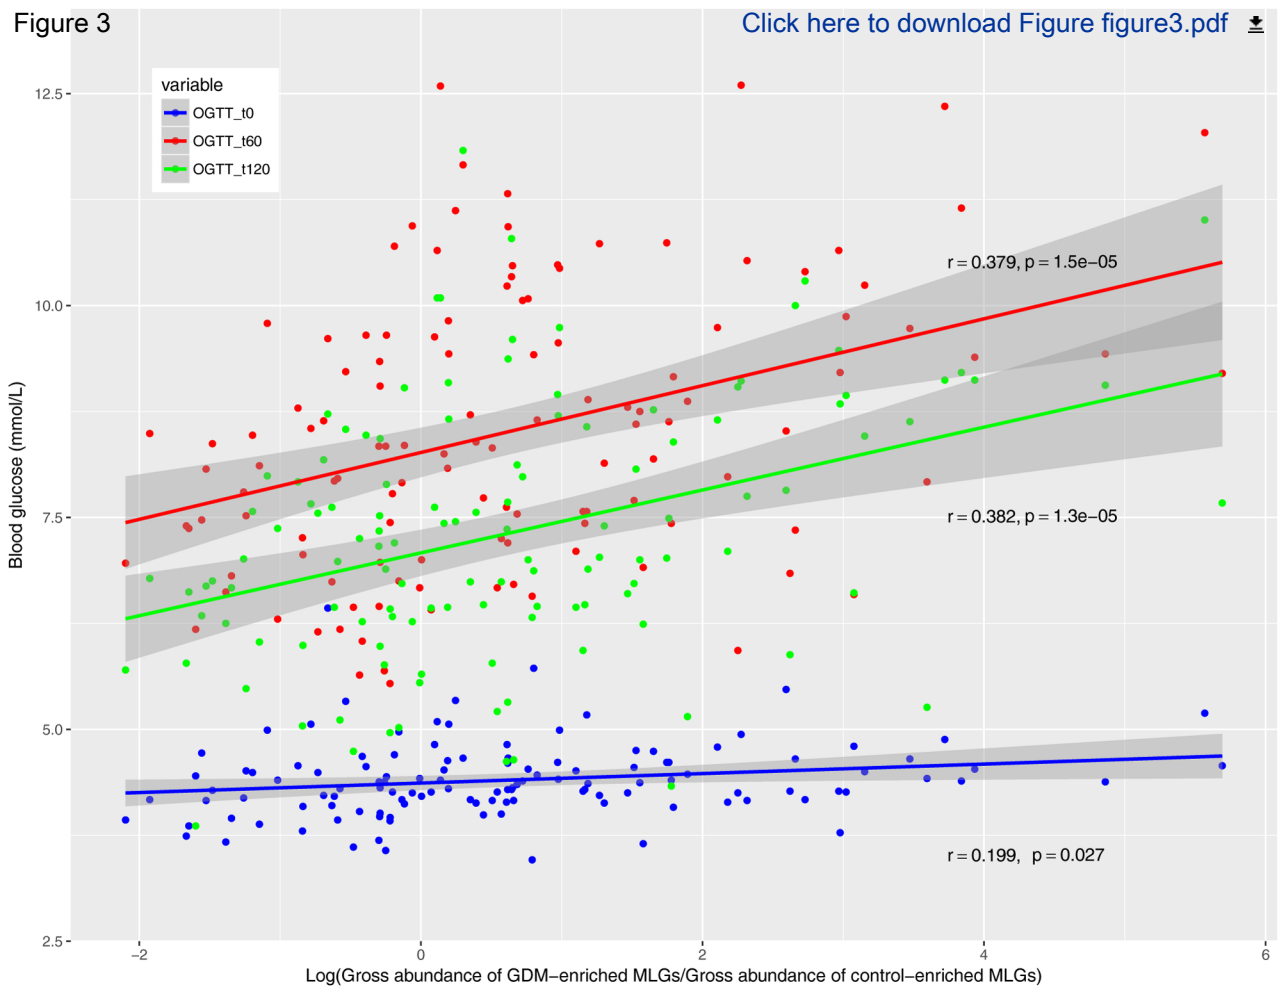



Figure 4

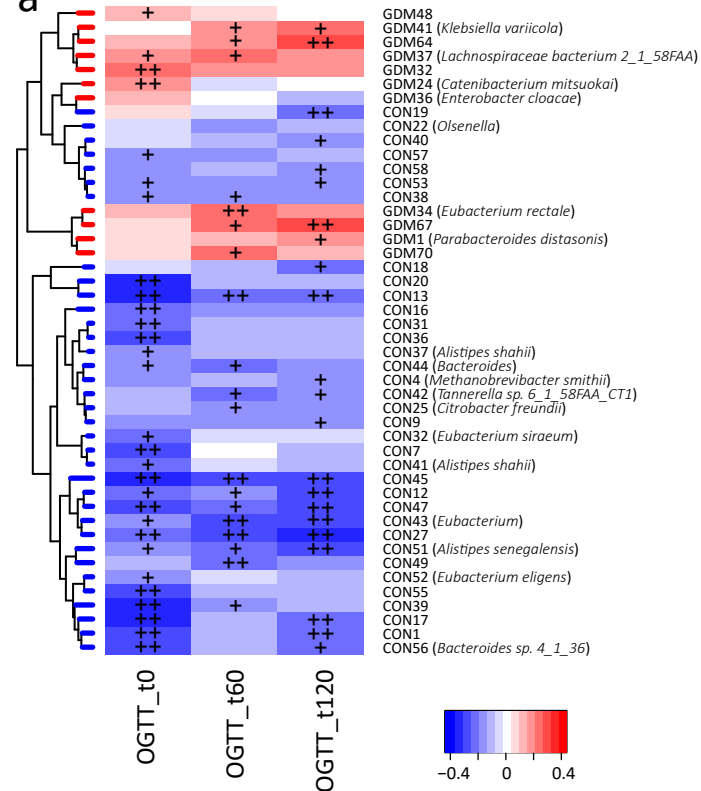

b Click here to download Figure Figure 4.pdf

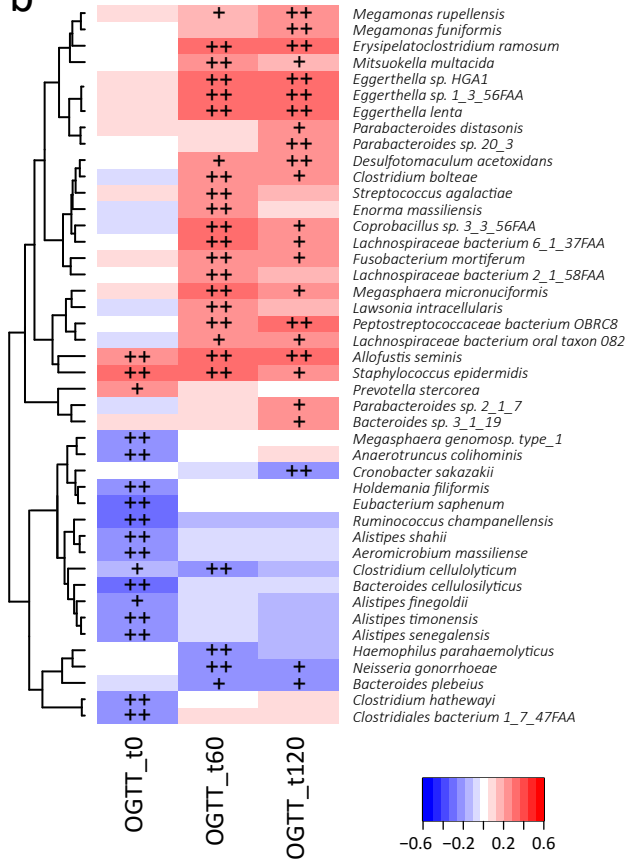

a

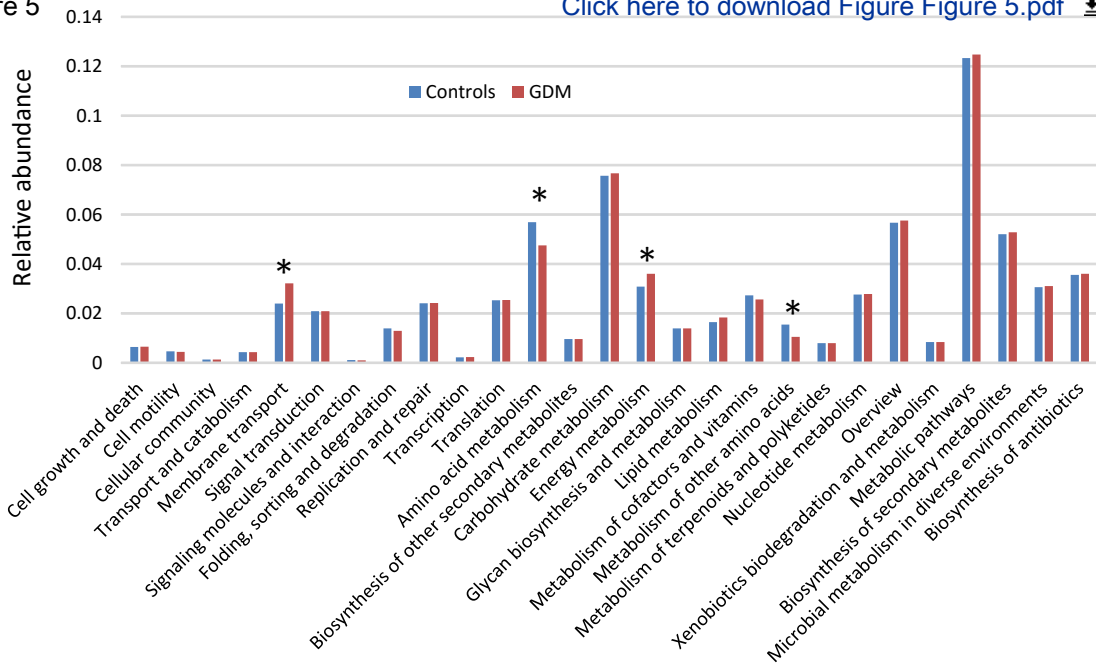

b

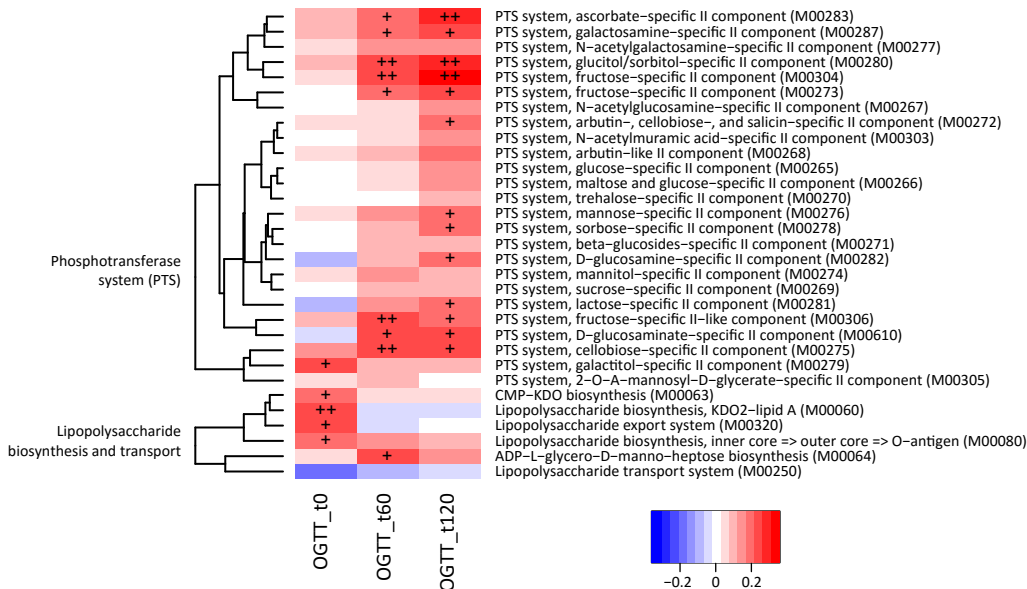

**a** Figure 6

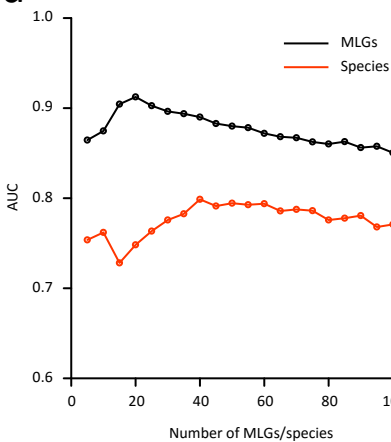

**b**

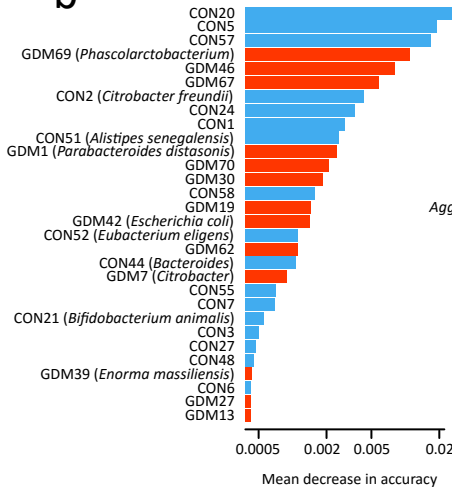

[Click here to download Figure Figure 6.pdf](#)

**c**

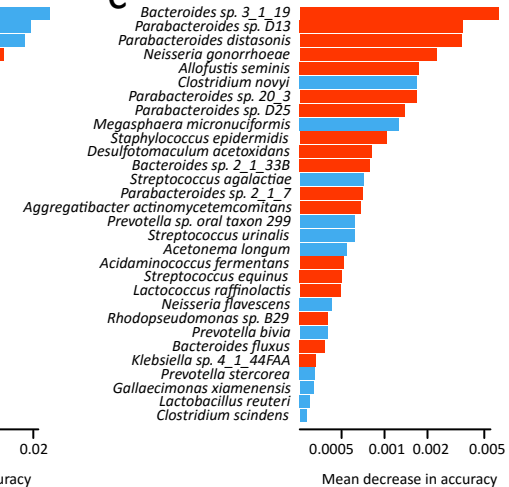

**d**

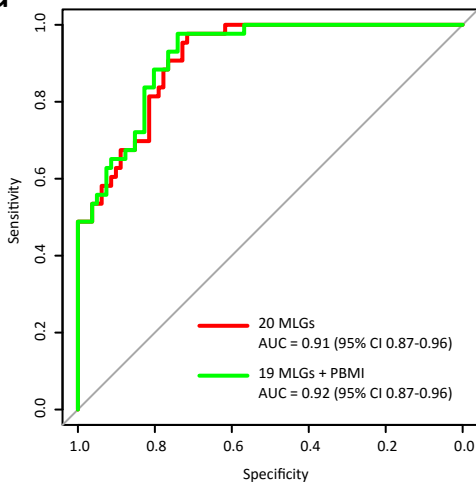

Figure 7

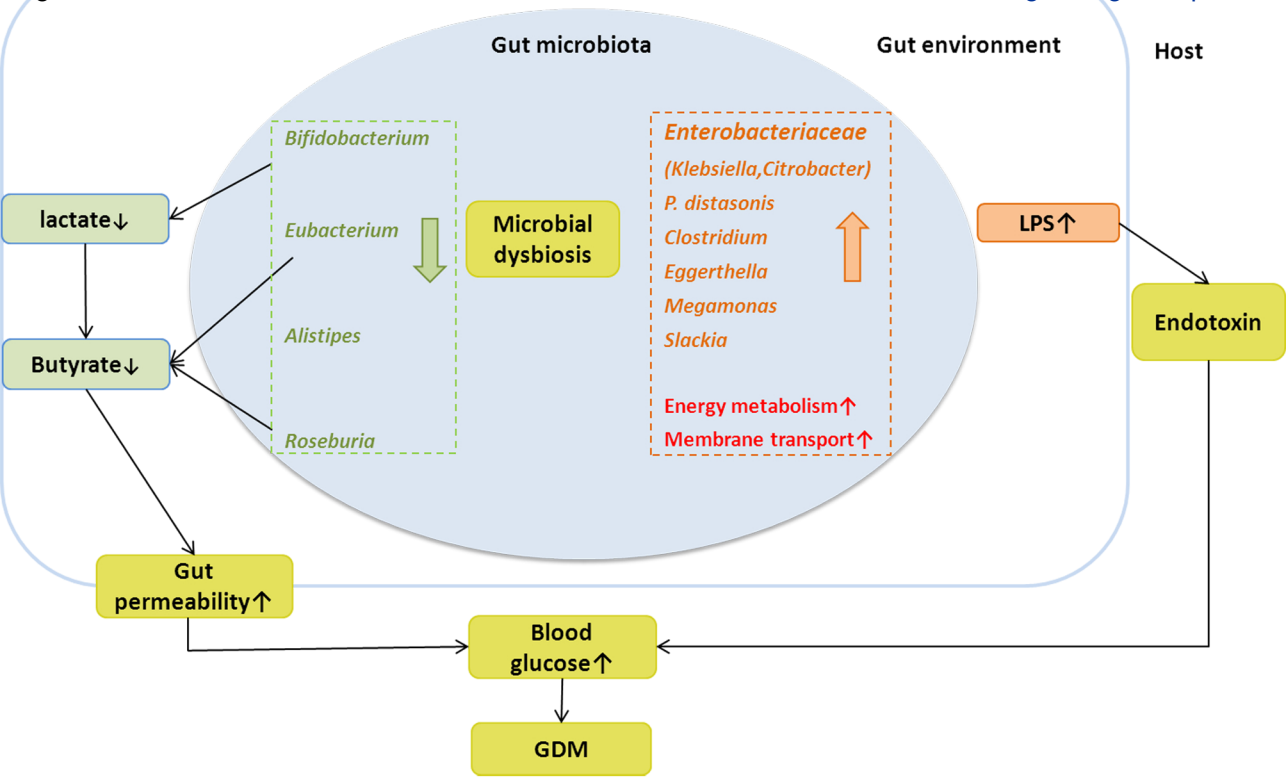

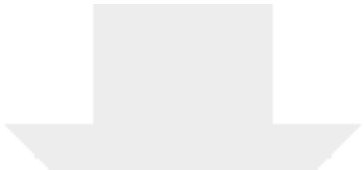

Click here to access/download  
**Supplementary Material**  
Additional file 1(1).xlsx



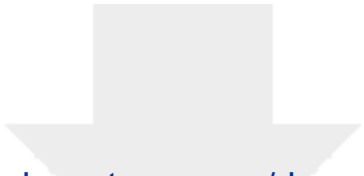

Click here to access/download  
**Supplementary Material**  
Additional file2.docx





Click here to access/download  
**Supplementary Material**  
declaration 1-guoyong.pdf



Dear Dr. Nogoy,

Thank you for inviting us to submit a revised manuscript. We are grateful for the reviewers' comments.

We have addressed each of the points raised by the reviewer and the Gigascience Editorial team, and outlined how we have dealt with these in the attached revised manuscript.

We look forward to hearing from you regarding the suitability of this manuscript for publication in your journal.

Sincerely,

Xiu Qiu, M. D., Ph. D.

Division of Birth Cohort Study,

Guangzhou Women and Children's Medical Center, Guangzhou Medical University

9 Jinsui Road, Tianhe District, Guangzhou 510623, China

Tel: 86 2038367162

Fax: 86 2038367162

Email: [qxIU0161@163.com](mailto:qxIU0161@163.com); xiu.qiu@bigcs.org.
